# Supplementary material for: Near-infrared Cr3+-doped lead-free halide perovskite microcrystals for information encryption and temperature thermometry
Source: Royal Society of Chemistry journal article supplement (doi:10.1039/d3tc04453j), 2024-01-01
Supplement: d3tc04453j1.pdf [file d3tc04453j1.pdf]

## Supporting Information

### Near-infrared Cr<sup>3+</sup>-doped lead-free halide perovskite microcrystals for information encryption and temperature thermometry

Wei Zhao<sup>a</sup>, Li Li<sup>a\*</sup>, Faling Ling<sup>a</sup>, Yongjie Wang<sup>a\*</sup>, Guotao Xiang<sup>a</sup>, Xianju Zhou<sup>a</sup>, Sha Jiang<sup>a</sup>, Zhiyu Yang<sup>a</sup>, Yongbin Hua<sup>b</sup>, Jae Su Yu<sup>b\*</sup>

<sup>a</sup>School of Science, Chongqing University of Posts and Telecommunications, Chongqing, 400065, P. R. China

<sup>b</sup>Department of Electronics and Information Convergence Engineering, Institute for Wearable Convergence Electronics, Kyung Hee University, Yongin-si, Gyeonggi-do 17104, Republic of Korea

**Keywords:** Lead-free double perovskite, Chromium(III) ions, Near-infrared, Information encryption

**Table S1.** Determined fitting parameters using 3rd-order ( $y=B_0+B_1x+B_2x^2+B_3x^3$ ) polynomial functions for temperature measurements.

| parameter                    | B <sub>0</sub> | B <sub>1</sub> | B <sub>2</sub>        | B <sub>3</sub>          | R <sup>2</sup> |
|------------------------------|----------------|----------------|-----------------------|-------------------------|----------------|
| FWHM                         | 106.21         | -0.365         | $3.37 \times 10^{-3}$ | $-5.377 \times 10^{-6}$ | 0.998          |
| $\lambda_{\text{centraoid}}$ | 950.65         | -0.349         | $2.91 \times 10^{-3}$ | $-4.553 \times 10^{-6}$ | 0.997          |

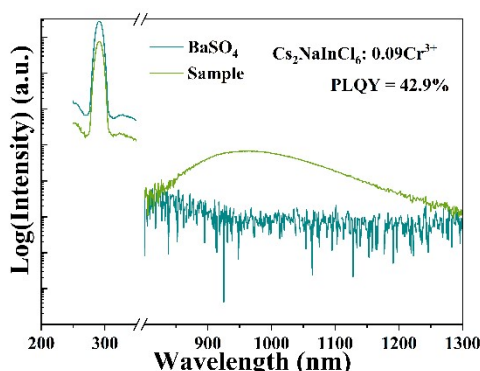

**Fig. S1.** PLQY analysis of the Cs<sub>2</sub>NaInCl<sub>6</sub>:0.09Cr<sup>3+</sup> under the excitation of 292 nm.

\* Corresponding author. Li Li; E-mail: [lilic@cqupt.edu.cn](mailto:lilic@cqupt.edu.cn). Yongjie Wang, [wangyj@cqupt.edu.cn](mailto:wangyj@cqupt.edu.cn); Jae Su Yu; E-mail: [jsyu@khu.ac.kr](mailto:jsyu@khu.ac.kr).

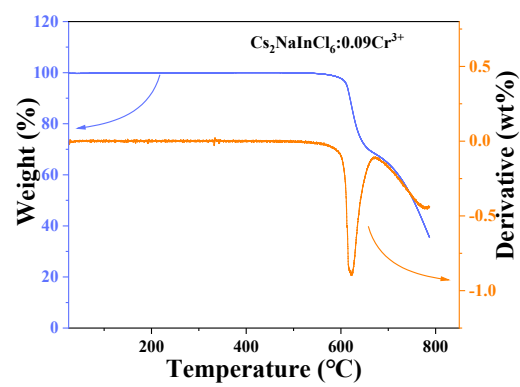

**Fig. S2.** TGA curve of  $\text{Cs}_2\text{NaInCl}_6:0.09\text{Cr}^{3+}$ .
